# Supplementary material for: Gestational age and the long-term impact on children’s infectious urinary morbidity
Source: Springer Nature journal article supplement (doi:10.1007/s00404-018-4973-4), 2018-12-04
Supplement: MOESM1 [file 16316612]

**Supplement Table: Coding of urinary morbidity diagnosis according to ICD-9**

| **Diagnosis Code** | **Diagnosis description** | **Subgroup** |
| --- | --- | --- |
| 5901 | ACUTE PYELONEPHRITIS | 1 |
| 5950 | ACUTE CYSTITIS | 1 |
| 5959 | CYSTITIS, UNSPECIFIED | 1 |
| 5970 | URETHRAL ABSCESS | 1 |
| 5990 | URINARY TRACT INFECTION, SITE NOT SPECIFIED | 1 |
| 59010 | AC. PYELONEPHRITIS WITHOUT LESION OF RENAL MEDULLARY NECROSIS | 1 |
| 59080 | PYELONEPHRITIS, UNSPECIFIED | 1 |
| 59581 | CYSTITIS CYSTICA | 1 |
| 59589 | OTHER SPECIFIED TYPES OF CYSTITIS | 1 |
| 59780 | URETHRITIS, UNSPECIFIED | 1 |
| 59789 | OTHER URETHRITIS | 1 |
| V1302 | PERSONAL HISTORY OF URINARY (TRACT) INFECTION | 1 |
